# Supplementary material for: Friedelin: Structure, Biosynthesis, Extraction, and Its Potential Health Impact
Source: MDPI journal article supplement (doi:10.3390/molecules28237760), 2023-11-24
Supplement: s1 [file s1]

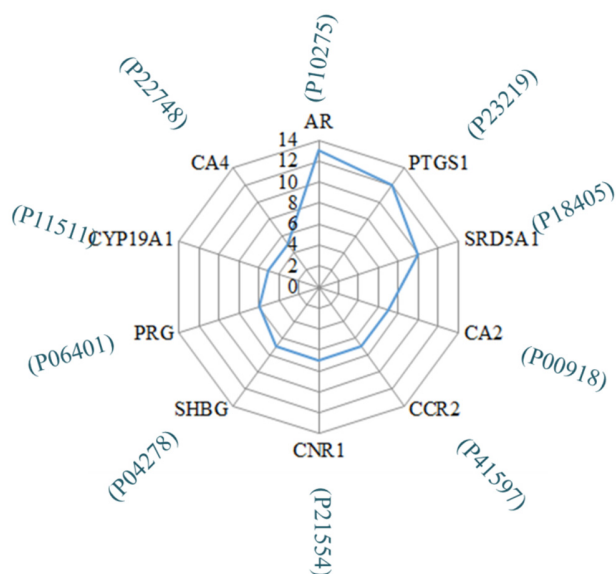

**Figure S1.** Integrated targets between friedelin and Ulcerative Colitis (UC). Abbreviation: AR-Androgen receptor; PTGS1-Cyclooxygenase-1; SRD5A1-Steroid 5-alpha-reductase 1; CA2-Carbonic anhydrase II; CCR2-C-C chemokine receptor type 2; CNR1- Cannabinoid receptor 1; SHBG Testis-specific androgen-binding protein; PGR- Progesterone receptor; CYP19A1-Cytochrome P450 19A1; CA4-Carbonic anhydrase IV.

**Table S1.** Computed chemical and physical properties of friedelin

| S. No. | Property Name                   | Property Value          |
|--------|---------------------------------|-------------------------|
| 1      | Molecular Weight                | 426.7g/mol              |
| 2      | XLogP3-AA                       | 9.8                     |
| 3      | Hydrogen Bond Donor Count       | 0                       |
| 4      | Hydrogen Bond Acceptor Count    | 1                       |
| 5      | Rotatable Bond Count            | 0                       |
| 6      | Topological Polar Surface Area  | 17.1Å <sup>2</sup>      |
| 7      | Heavy Atom Count                | 31                      |
| 8      | Formal Charge                   | 0                       |
| 9      | Complexity                      | 781                     |
| 10     | Isotope Atom Count              | 0                       |
| 11     | Defined Atom Stereocenter Count | 9                       |
| 12     | Covalently-Bonded Unit Count    | 1                       |
| 13     | Compound Is Canonicalized       | Yes                     |
| 14     | Appearance                      | Colorless white crystal |
